# Supplementary material
Source: PubMed Central journal article supplement (PMC3241796)
Supplement: 1112371108_pnas.201112371SI.pdf [file 1112371108_pnas.201112371SI.pdf]

# Supporting Information

Cossart 10.1073/pnas.1112371108

Table S1. The 11 main *Listeria monocytogenes* outbreaks since 1976

| Year    | Location       | Cases | Perinatal cases | Deaths | Suspected/implicated vehicle           | Serotype |
|---------|----------------|-------|-----------------|--------|----------------------------------------|----------|
| 1983–87 | Switzerland    | 122   | 65              | 34     | Vacherin Mont d'Or cheese              | 4b       |
| 1985    | United States  | 142   | 94              | 48     | Mexican-style cheese                   | 4b       |
| 1987–89 | United Kingdom | 355   | 185             | 94     | Paté                                   | 4b       |
| 1992–93 | France         | 279   | 0               | 85     | Pork tongue in jelly                   | 4b       |
| 1997    | Italy          | 1566  | 0               | 0      | Sweetcorn salad                        | 4b       |
| 1998–99 | United States  | 108   | ?               | 14     | Hot dogs                               | 4b       |
| 2002    | United States  | 54    | 12              | 8      | Delicatessen turkey ready-to-eat meats | 4b       |
| 2006–07 | Germany        | 189   | 11              | 26     | German cheese                          | 4b       |
| 2006    | Czech Republic | 75    | 14              | 12     | Mature cheeses and mixed salads (?)    | 1/2b     |
| 2008    | Canada         | 57    | ?               | 22     | Ready-to-eat meat products             | 1/2a     |
| 2011    | United States  | 139   | ?               | 29     | Cantaloupe                             | ?        |
